# Supplementary material for: Giant and reversible photoluminescence modulation based on in situ electric-field-controlled antiferroelectric–ferroelectric phase transition
Source: Royal Society of Chemistry journal article supplement (doi:10.1039/d2tc03018g), 2022-01-01
Supplement: d2tc03018g1.pdf [file d2tc03018g1.pdf]

**Giant and reversible photoluminescence modulation based on *in situ*  
electric-field-controlled antiferroelectric-ferroelectric phase  
transition**

Yu Zhang<sup>a</sup>, Ying Huang<sup>a</sup>, Wuming Xue<sup>a</sup>, Xiao Wu<sup>a</sup>, Chunlin Zhao<sup>a</sup>, Tengfei Lin<sup>a</sup>, Cong  
Lin<sup>a</sup>, Min Gao<sup>a\*</sup>

<sup>a</sup> *College of Materials Science and Engineering, Fuzhou University, Fuzhou, 350108,  
China*

\*Corresponding author.

Email: gaom@fzu.edu.cn

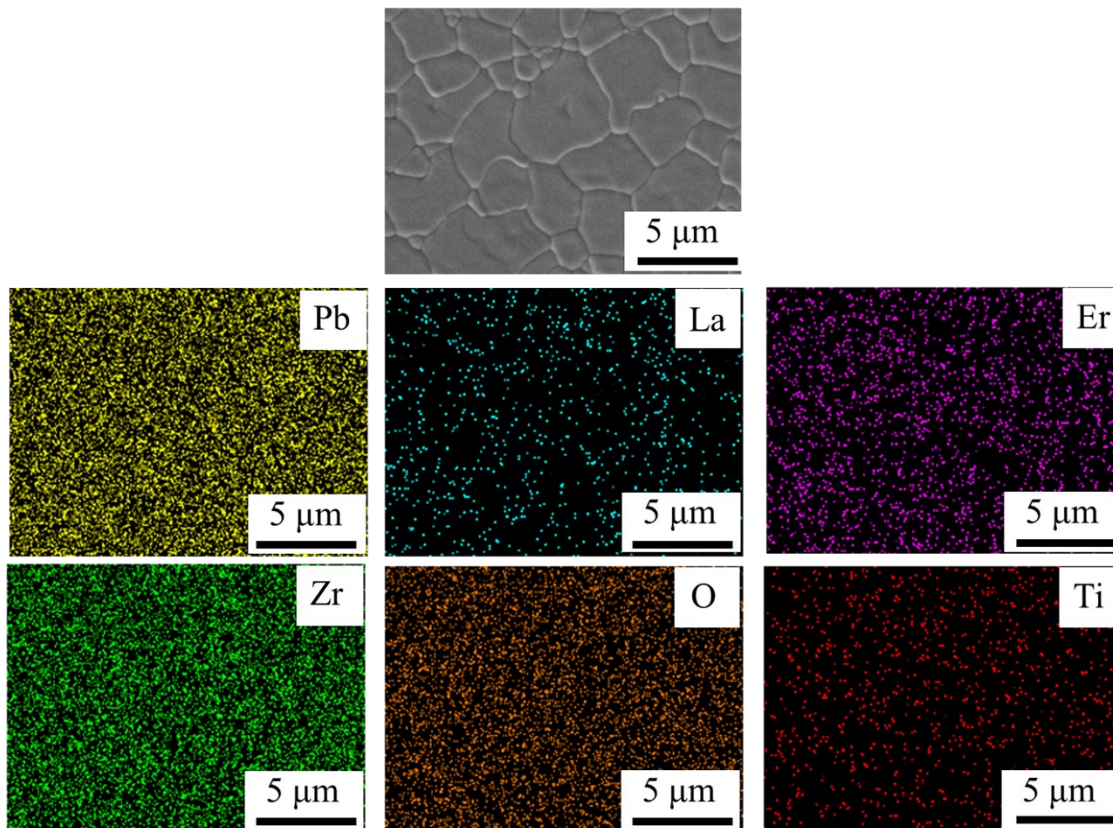

**Figure S1.** Scanning electron microscopy (SEM) image of the 0.5 mol%  $\text{Er}^{3+}$  doped  $\text{Pb}_{0.96}\text{La}_{0.04}\text{Zr}_{0.9}\text{Ti}_{0.1}\text{O}_3$  (PLZT-Er) ceramic, and corresponding energy-dispersive X-ray spectroscopy (EDS) images that demonstrate the homogeneity of the elemental distribution.

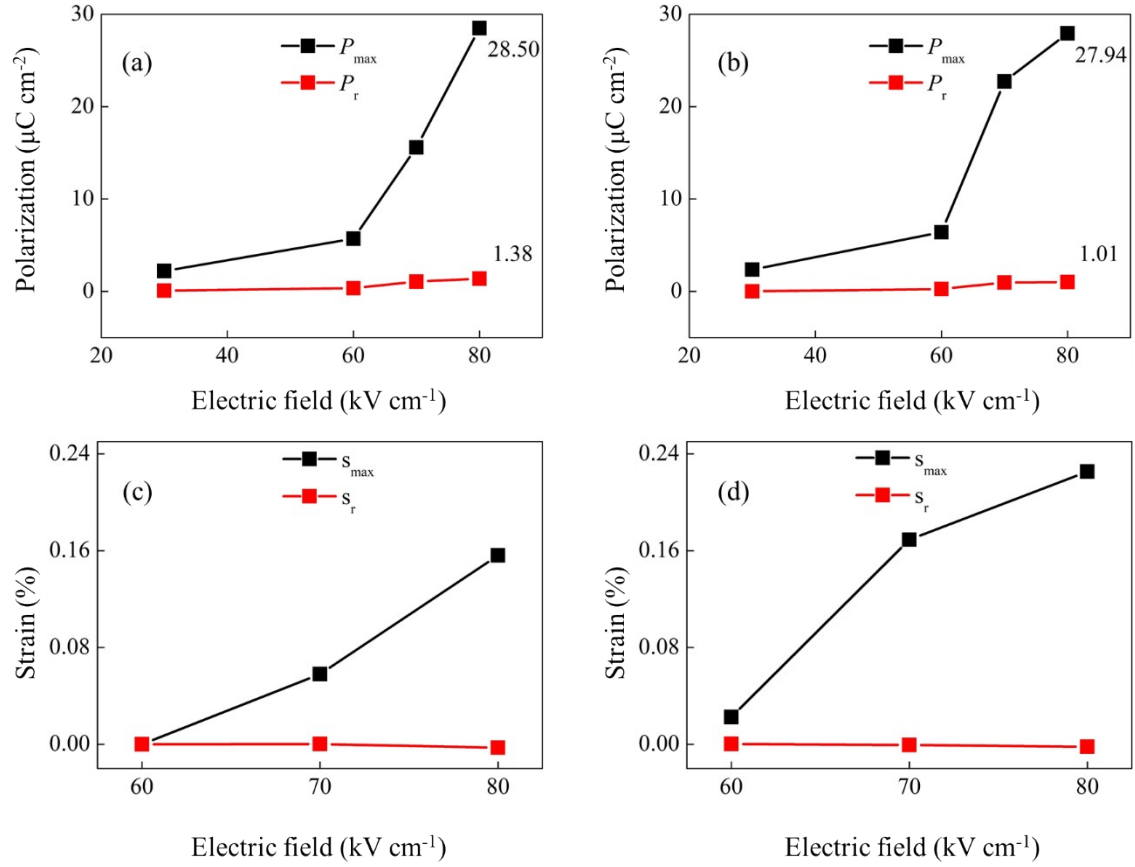

**Figure S2.** (a) (b) Maximum polarization ( $P_{\text{max}}$ ) and remnant polarization ( $P_{\text{r}}$ ) of PLZT and PLZT-Er under various maximum electric fields ( $E$ ). (c) (d) Maximum strain ( $s_{\text{max}}$ ) and remnant strain ( $s_{\text{r}}$ ) of PLZT and PLZT-Er under various maximum electric fields ( $E$ ). (a) (c) Pure PLZT, and (b) (d) PLZT-Er.

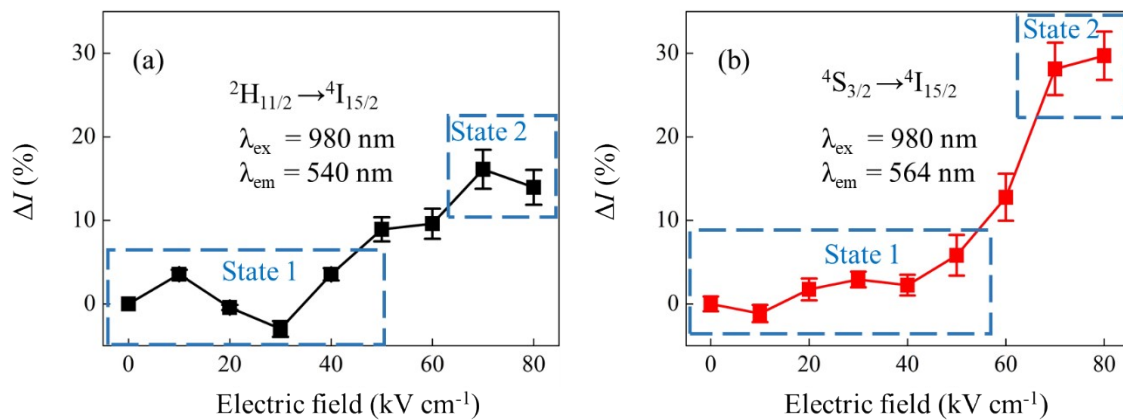

**Figure S3.** Photoluminescence (PL) enhancement ratio as a function of applying  $E$  from 0 to 80 kV cm<sup>-1</sup>: (a) 540 nm, and (b) 564 nm. Two distinguishable states are marked.

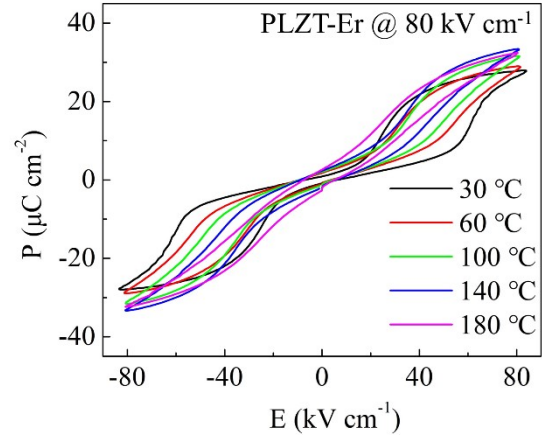

**Figure S4.** Temperature dependent  $P$ - $E$  curves of PLZT-Er sample at  $E = 80 \text{ kV cm}^{-1}$ .

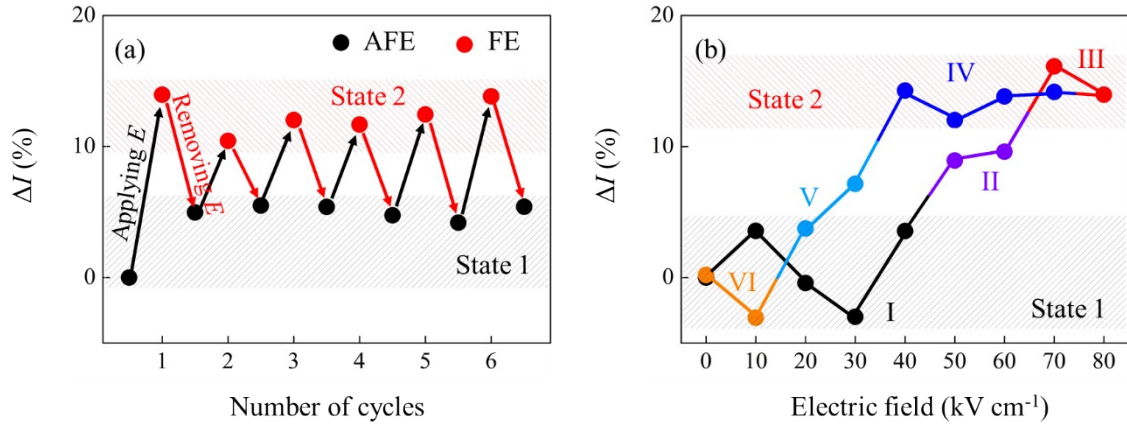

**Figure S5.** (a) PL enhancement ratio of PLZT-Er under an alternate  $E$  between 0 and 80  $\text{kV cm}^{-1}$ . (b) PL enhancement ratio of the PLZT-Er ceramic under a cycle of *in situ*  $E$  between 0 and 80  $\text{kV cm}^{-1}$ . Six nonlinear change sections (I to VI) and two distinguishable PL states are marked in (b). The PL band is at 540 nm.
